# Supplementary material for: A non-peptide probe for detecting chymotrypsin activity based on protection–deprotection strategy in living systems
Source: Royal Society of Chemistry journal article supplement (doi:10.1039/d1tb01509e), 2021-01-01
Supplement: d1tb01509e1.pdf [file d1tb01509e1.pdf]

*Supporting Information for*

**A non-peptide probe for detecting chymotrypsin activity based on protection and deprotection strategy in living systems**

Xiang Zou, Yuping Zhao, Chaofeng Lai, Yun Liang, Weiyong Lin\*

Guangxi Key Laboratory of Electrochemical Energy Materials, Institute of Optical Materials and Chemical Biology, School of Chemistry and Chemical Engineering, Guangxi University, Nanning, Guangxi 530004, P. R. China

E-mail: [weiyonglin2013@163.com](mailto:weiyonglin2013@163.com)

## Table of contents

|                                           | Pages |
|-------------------------------------------|-------|
| Materials and instruments .....           | S3    |
| Cell culture and cytotoxicity assays..... | S3    |
| Scheme S1 .....                           | S4    |
| Synthesis of compound 2 .....             | S4    |
| Synthesis of compound DTOH .....          | S5    |
| Table S1.....                             | S6    |
| Figure S1 .....                           | S7    |
| Figure S2 .....                           | S7    |
| Figure S3 .....                           | S8    |
| Figure S4 .....                           | S8    |
| Figure S5 .....                           | S9    |
| Figure S6 .....                           | S9    |
| Figure S7 .....                           | S9    |
| Figure S8 .....                           | S10   |
| Figure S9 .....                           | S10   |
| Figure S10 .....                          | S11   |
| Table S2.....                             | S12   |
| References.....                           | S13   |

**Materials and instruments.** Unless otherwise stated, all reagents were purchased from commercial suppliers and used without further purification. Ultrapure water was used throughout all experiments. High resolution mass spectrometric (HRMS) analyses were measured on a Finnigan MAT 95 XP spectrometer; NMR spectra were recorded on an INOVA-400 spectrometer, using TMS as an internal standard; The fluorescence spectra were obtained on a F-4700 spectrofluorometer from Hitachi High-tech Science; The absorption spectra were collected on UV-2700 visible spectrophotometer from Shimadzu Scientific Instruments; The fluorescence imaging of cells was performed with TSC-SP8 (Leica, Wetzlar, Germany) confocal laser scanning microscope; The pH measurements were carried out on a PHS-3E PH meter from INESA Instrument; TLC analysis was performed on silica gel plates and column chromatography was conducted over silica gel (mesh 200-300), both of which were obtained from the Qingdao Ocean Chemicals. The chymotrypsin used in the experiment was derived from Shanghai Yuanye Biotechnology Co., LTD (S10001-1g USP, 1500 U/mg).

**Detection limit.** The detection limit is based on the reporting method <sup>S1</sup>. According to the results of titration experiments, the fluorescence intensity ( $I_{587}$ ) measured by CHT with different concentrations of **DT** was normalized between the minimum and maximum intensity. Then, the linear regression curve was fitted to the normalized fluorescence intensity data, and the detection limit was calculated using the formula  $3\sigma/k$ .

**Cell culture and cytotoxicity assays.** The living P815、3T3、MCF-7 cells were cultured in Dulbecco's modified Eagle's medium (DMEM) supplemented with 10% fetal bovine serum (FBS), 1% penicillin (100 U/mL, Hyclone) and streptomycin sulfate (100 U/mL, Hyclone). The cells were cultured at 37 °C and under a 5% CO<sub>2</sub> atmosphere.

The cytotoxicity of **DT** to living cells was performed by standard MTT assays. 2

$\times 10^4$  cells/mL living cells were seeded in 96-well plates and then incubated with different concentrations of **DT** (0-50  $\mu$ M) for 12 h. Subsequently, P815、3T3、MCF-7 cells were incubated with 5 mg/mL MTT (10  $\mu$ L per well) and treated for 4 h. After that the supernatants were aspirated and 100  $\mu$ L DMSO was added to per well. The absorbance of the solution at 490 nm was recorded using microplate reader. The cell viability (%) =  $(OD_{\text{sample}} - OD_{\text{blank}}) / (OD_{\text{control}} - OD_{\text{blank}}) \times 100\%$ .

$OD_{\text{sample}}$  denotes cells treated with various concentrations of **DT**;  $OD_{\text{blank}}$  denotes the plates with DMEM;  $OD_{\text{control}}$  denotes cells without treated with **DT**. Each concentration was conducted with six parallel samples, and the results were expressed as mean  $\pm$  standard deviation (SD).

## Synthesis

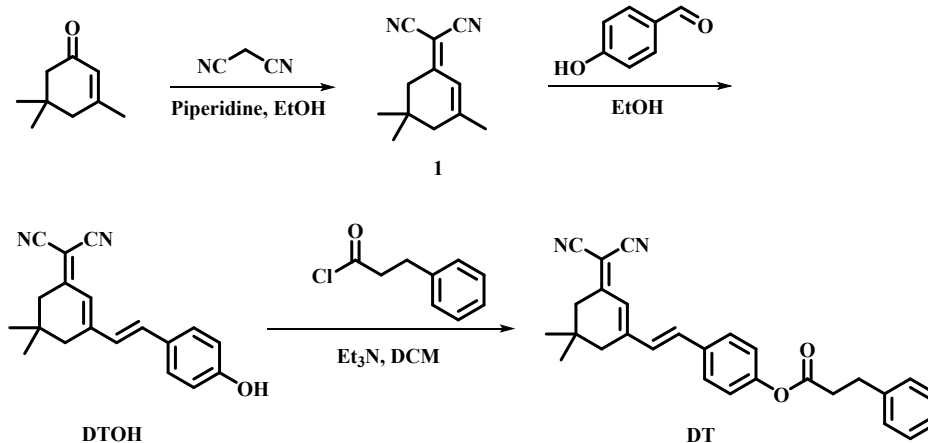

**Scheme S1.** Synthesis route of the fluorescent probe **DT**.

**Synthesis of compound 2:** Three millimoles (450  $\mu$ L) of isophorone and 3 mmol of malononitrile were dissolved in 10 mL of ethanol. The reaction was refluxed for 8 h, and then solvent was removed under vacuum.

Residues were purified by a silica gel column chromatograph using mobile phase (PE/EA = 20/1) to acquire compound **1**, white solid, 435.2 mg with a yield: 83%. <sup>1</sup>H NMR (600 MHz, DMSO-*d*<sub>6</sub>) δ 6.56 (s, 1H), 2.54 (s, 2H), 2.24 (s, 2H), 2.05 (s, 3H), 0.96 (s, 6H).

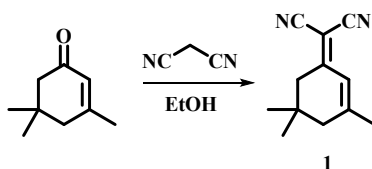

**Synthesis of compound DTOH:** Dissolve **1** (0.5 mmol, 700 mg) and 4-hydroxybenzaldehyde (0.5 mmol, 62 mg) in 10 mL of ethanol, and then add 2 to 3 drops of piperidine (the mixture solution is red). The mixture was refluxed at 70°C for 6 hours. After the reaction, the mixed solution was cooled to room temperature to produce a red precipitate, which was then washed with absolute ethanol and purified by column chromatography with a mixture of dichloromethane and methanol (DCM/MeOH = 20:1) to obtain **DTOH** as a red solid 78%. <sup>1</sup>H NMR (600 MHz, DMSO-*d*<sub>6</sub>) δ 9.98 (s, 1H), 7.56 (d, *J* = 8.7 Hz, 2H), 7.21 (q, *J* = 16.1 Hz, 2H), 6.81 (d, *J* = 3.1 Hz, 2H), 6.79 (s, 1H), 2.60 (s, 2H), 2.53 (s, 2H), 1.02 (s, 6H).

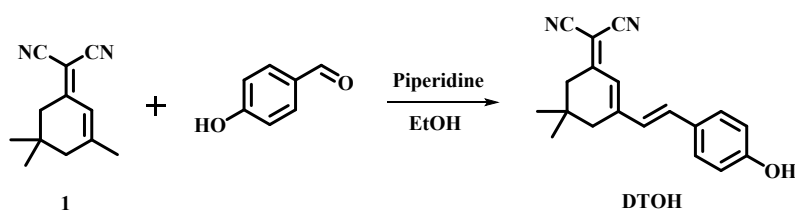

**Table S1.** Non-peptide fluorescent probes for the detection of CHT.

| Probe structure                                                                    | Synthesis procedures                                                | Wavelength (nm)                                                         | Detection limit | Notable experiments                                                              | Limitations                                   | References                                           |
|------------------------------------------------------------------------------------|---------------------------------------------------------------------|-------------------------------------------------------------------------|-----------------|----------------------------------------------------------------------------------|-----------------------------------------------|------------------------------------------------------|
| 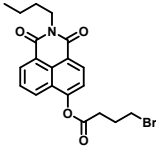   | Steps; 4,<br>Reactants: 7,<br>Solvents: 3,<br>Time: $\geq 40$ hrs.  | $\lambda_{\text{ex}} = 450$ nm,<br>$\lambda_{\text{em}} = 500 - 600$ nm | 8.4 ng/mL       | Spectroscopic tests and inhibitors                                               | Not suitable for vivo imaging of chymotrypsin | <i>Sens. Actuators, B</i> <b>2018</b> , 273, 204–210 |
|    | Steps; 5,<br>Reactants: 10,<br>Solvents: 3,<br>Time: $\geq 40$ hrs. | $\lambda_{\text{ex}} = 670$ nm,<br>$\lambda_{\text{em}} = 680 - 720$ nm | 0.013 U/mL      | Detection of endogenous chymotrypsin in mice and cells                           | Cell experiments has a long response time     | <i>Sens. Actuators, B</i> <b>2020</b> , 306, 127567  |
|    | Steps; 3,<br>Reactants: 7,<br>Solvents: 3,<br>Time: 17 hrs.         | $\lambda_{\text{ex}} = 455$ nm,<br>$\lambda_{\text{em}} = 500 - 600$ nm | 50 ng/mL        | Spectroscopic tests and inhibitors                                               | Not suitable for vivo imaging of chymotrypsin | <i>Anal. Chem.</i> <b>2017</b> , 89, 3687–3693       |
|  | Steps; 3,<br>Reactants: 5,<br>Solvents: 2,<br>Time: 16 hrs.         | $\lambda_{\text{ex}} = 410$ nm,<br>$\lambda_{\text{em}} = 525 - 700$ nm | 0.071 U/mL      | Detection of endogenous chymotrypsin in living cells, mice viscera and zebrafish | -                                             | (This work)                                          |

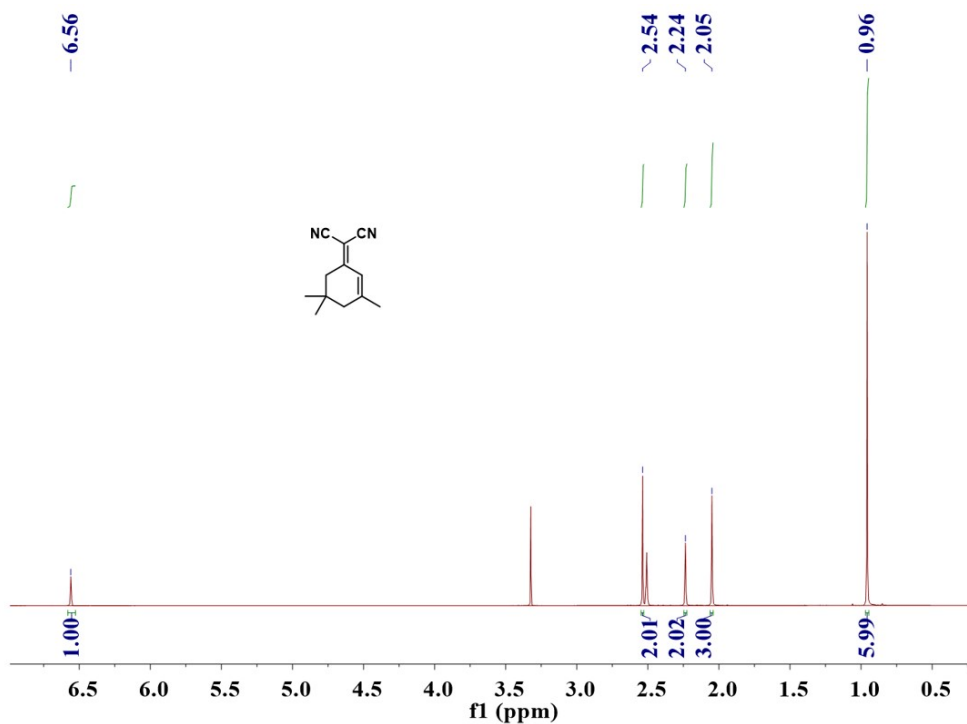

Figure S1.  $^1\text{H}$  NMR spectrum of **2** in  $d_6$ -DMSO.

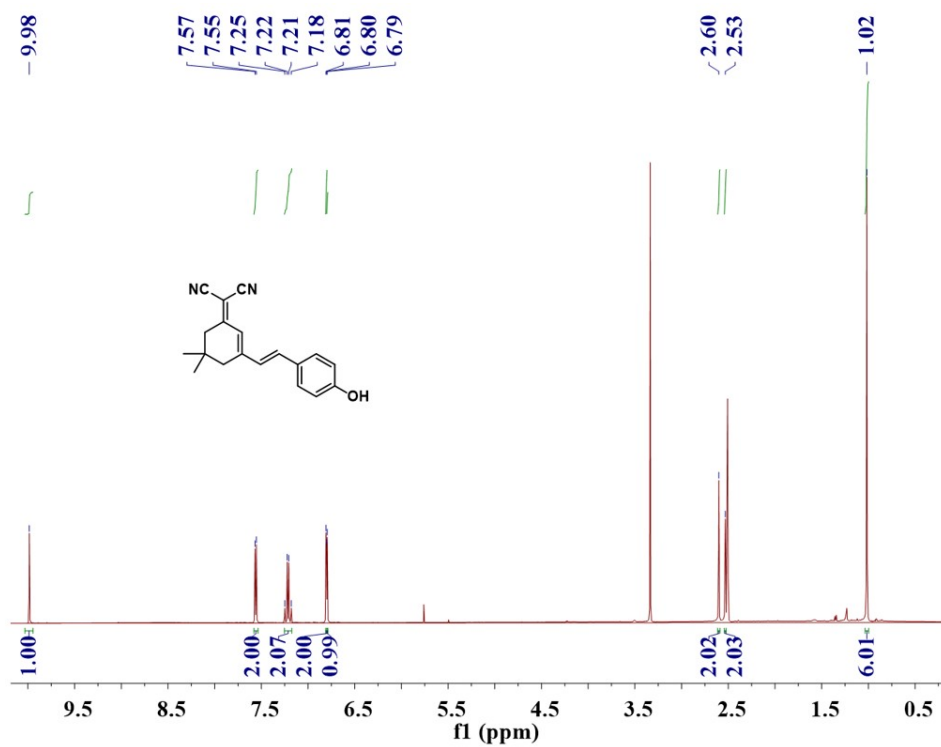

Figure S2.  $^1\text{H}$  NMR spectrum of **DTOH** in  $d_6$ -DMSO.

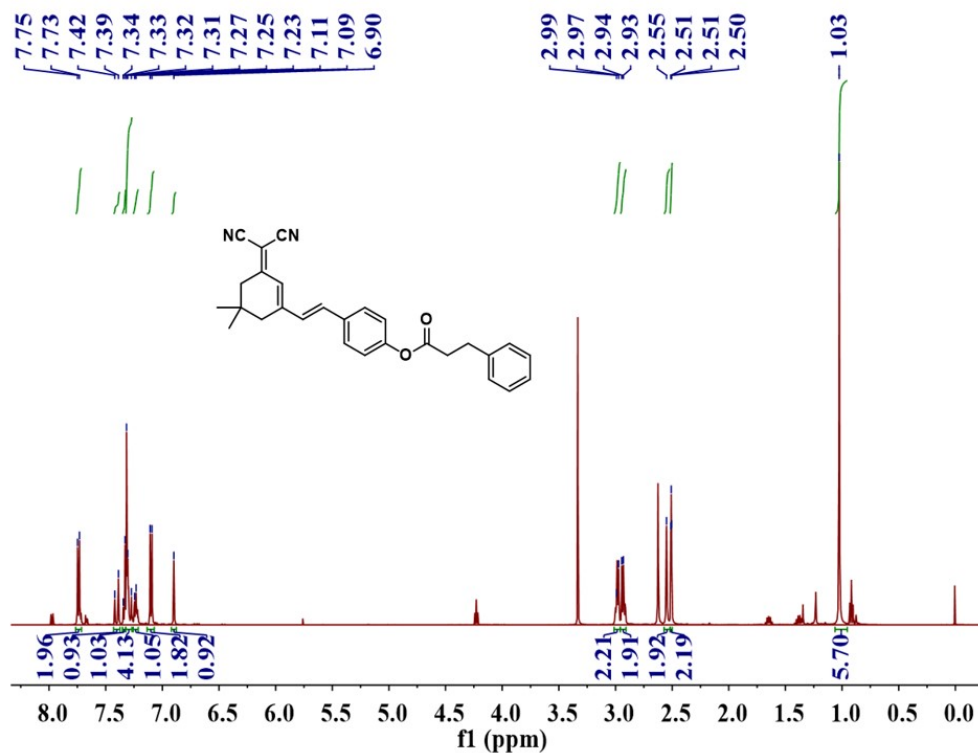

Figure S3.  $^1\text{H}$  NMR spectrum of DT in  $d_6$ -DMSO.

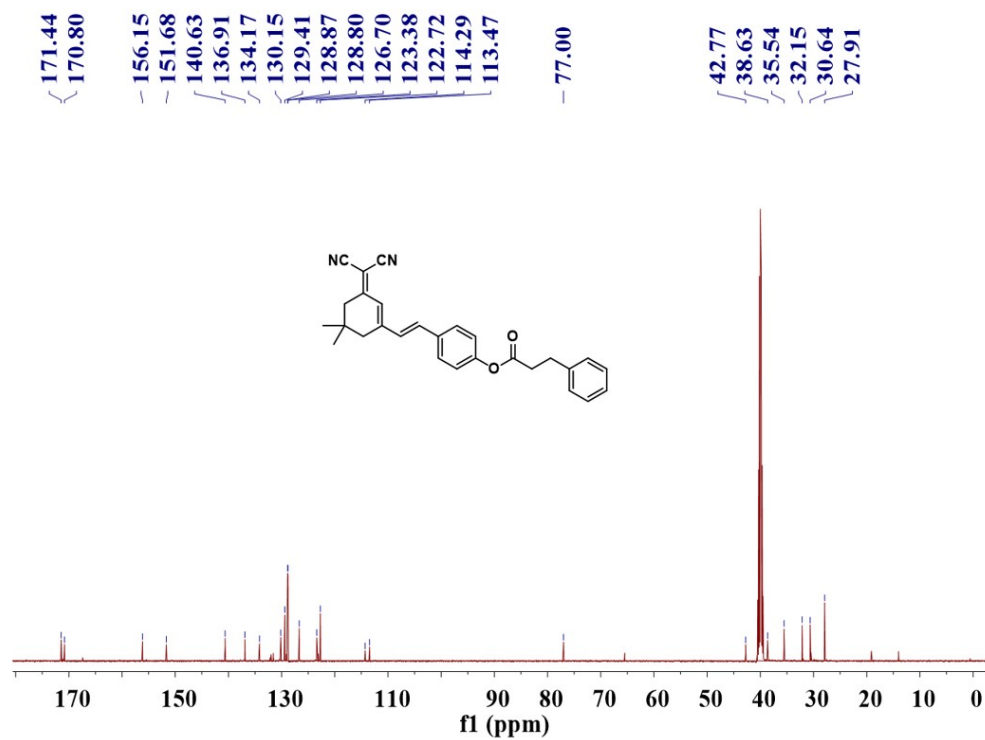

Figure S4.  $^{13}\text{C}$  NMR spectrum of DT in  $d_6$ -DMSO.



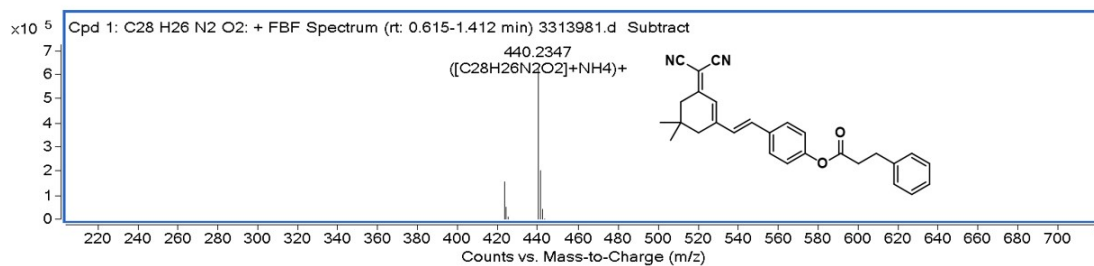

**Figure S5.** The ESI-MS spectrum of **DT** in DMSO.

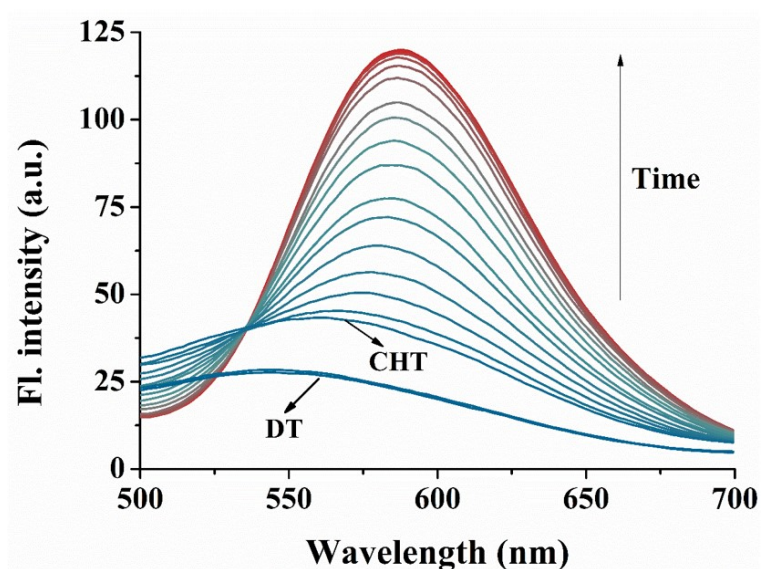

**Figure S6.** The fluorescence spectral peak changes of the probe **DT** with 45 U/mL CHT during 42 mins.  $\lambda_{\text{ex}} = 410 \text{ nm}$ , slit: 5 nm/5 nm,  $U = 600 \text{ V}$ .

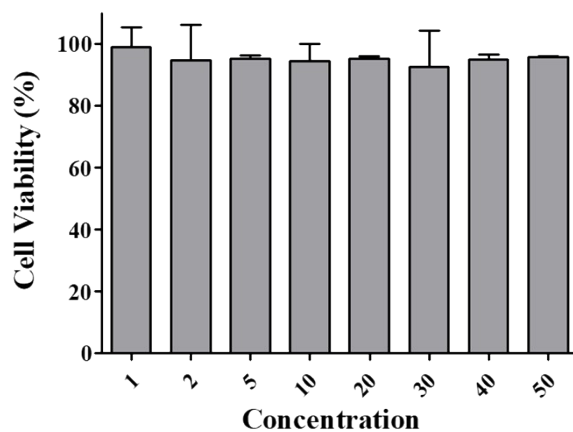

**Figure S7.** The viability of **P815** cells was treated with different concentrations (0  $\mu\text{M}$ , 1  $\mu\text{M}$ , 5  $\mu\text{M}$ , 10  $\mu\text{M}$ , 20  $\mu\text{M}$ , 30  $\mu\text{M}$ , 40  $\mu\text{M}$ , 50  $\mu\text{M}$ ) of **DT** for 12 hours.

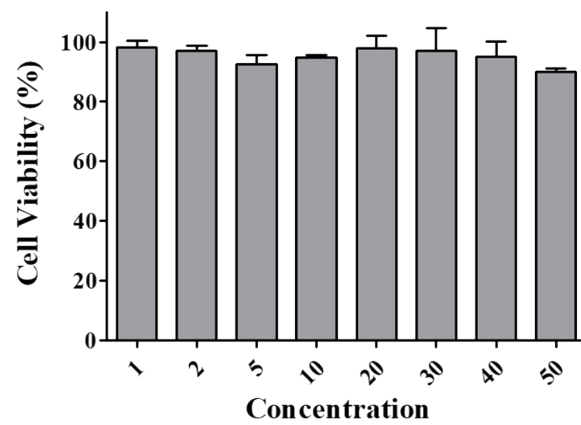

**Figure S8.** The viability of **3T3** cells was treated with different concentrations (0  $\mu\text{M}$ , 1  $\mu\text{M}$ , 5  $\mu\text{M}$ , 10  $\mu\text{M}$ , 20  $\mu\text{M}$ , 30  $\mu\text{M}$ , 40  $\mu\text{M}$ , 50  $\mu\text{M}$ ) of **DT** for 12 hours.

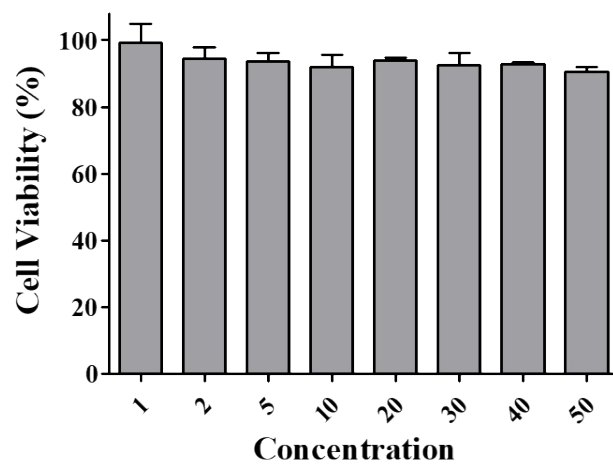

**Figure S9.** The viability of **MCF-7** cells was treated with different concentrations (0  $\mu\text{M}$ , 1  $\mu\text{M}$ , 5  $\mu\text{M}$ , 10  $\mu\text{M}$ , 20  $\mu\text{M}$ , 30  $\mu\text{M}$ , 40  $\mu\text{M}$ , 50  $\mu\text{M}$ ) of **DT** for 12 hours.

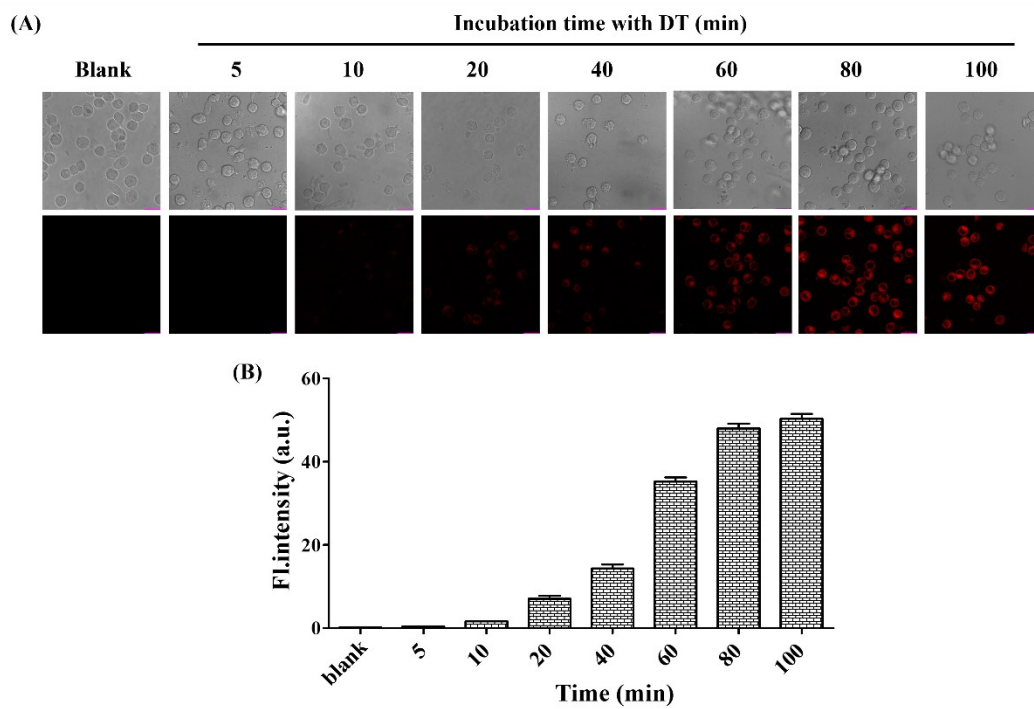

**Figure S10.** (A) The images of P815 cells incubated with **DT** in different time (5, 10, 20, 40, 60, 80, and 100 mins) were imaged under  $100\times$  oil mirror; (B) Histogram of fluorescence intensity of (A) at different time. Bar = 20  $\mu\text{m}$ ;  $\lambda_{\text{ex}} = 405 \text{ nm}$ .

Table S2. Properties of peptide fluorescent probes and non-peptide fluorescent probe **DT**.

| Item | The article DOI no.                                                                                        | Wavelength (nm)       |                       | Biological experiment              | Living sample types  | Incubation time (mins) |
|------|------------------------------------------------------------------------------------------------------------|-----------------------|-----------------------|------------------------------------|----------------------|------------------------|
|      |                                                                                                            | $\lambda_{\text{ex}}$ | $\lambda_{\text{em}}$ |                                    |                      |                        |
| 1    | 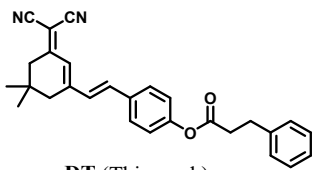<br><b>DT</b> (This work) | 410                   | 525 - 700             | Detection of chymotrypsin          | 3T3, MCF-7, P815     | 60                     |
| 2    | org/10.1016/0003-2697(85)90216-7                                                                           | 325                   | 465/510               | Detection of chymotrypsin          | -                    | -                      |
| 3    | org/10.1016/j.bios.2016.08.029                                                                             | 570                   | 600 - 680             | Detection of chymotrypsin          | -                    | -                      |
| 4    | 10.1039/c8cc01731j                                                                                         | 435                   | 450 - 600             | Protease detection                 | -                    | -                      |
| 5    | 10.1038/cr.2013.11                                                                                         | 400                   | 450 - 600             | Autophagosome-lysosome fusion      | E. coli DH5 $\alpha$ | 180                    |
| 6    | 10.1039/c7cc06056d                                                                                         | 497                   | 525                   | Collagen detection                 | Connective tissues   | 120                    |
| 7    | 10.1016/j.talanta.2018.11.011                                                                              | 260                   | 510 - 570             | Carcinoembryonic antigen detection | Human serum          | 90                     |
| 8    | 10.1039/c4cc00670d                                                                                         | 410                   | 550 - 700             | Lysosomal tracking                 | A549                 | 60                     |

## References

- [1] Shortreed M.; Kopelman R.; Kuhn M.; Hoyland B. Fluorescent Fiber-Optic Calcium Sensor for Physiological Measurements. *Anal. Chem.*, **1996**, *68*, 1414-1418.
